# Supplementary material for: Different exercise training modalities produce similar endothelial function improvements in individuals with prehypertension or hypertension: a randomized clinical trial Exercise, endothelium and blood pressure
Source: PubMed Central journal article supplement (PMC7203179; doi:10.1038/s41598-020-64365-x), 2020-05-06
Supplement: 41598_2020_64365_MOESM1_ESM.pdf [file 41598_2020_64365_MOESM1_ESM.pdf]

**Different exercise training modalities produce similar endothelial function improvements in individuals with prehypertension or hypertension: a randomized clinical trial**

Marinei L Pedralli<sup>1</sup>, Rafael A Marschner<sup>2</sup>, Daniel P Kollet<sup>1</sup>, Salvador G Neto<sup>1</sup>, Bruna Eibel<sup>1</sup>, Hirofumi Tanaka<sup>3</sup>, Alexandre M Lehen<sup>1\*</sup>

<sup>1</sup> Institute of Cardiology of Rio Grande do Sul/University Foundation of Cardiology, Porto Alegre, Brazil.

<sup>2</sup> Thyroid Section, Endocrine Division, Hospital de Clínicas de Porto Alegre, Federal University of Rio Grande do Sul, Porto Alegre, Brazil.

<sup>3</sup> Cardiovascular Aging Research Laboratory, Department of Kinesiology & Health Education, The University of Texas at Austin, Austin, TX USA.

\* ORCID: <https://orcid.org/0000-0002-5912-8020>

**Corresponding Author:**

Dr Alexandre Machado Lehen

Instituto de Cardiologia do Rio Grande do Sul

Av. Princesa Isabel, 395 Santana, 90620-001 Porto Alegre – RS Brazil

Phone: +55(51)32303600, branch 3636/3757

Fax: +55(51)32303600 branch 3757

[amlehen@gmail.com](mailto:amlehen@gmail.com)

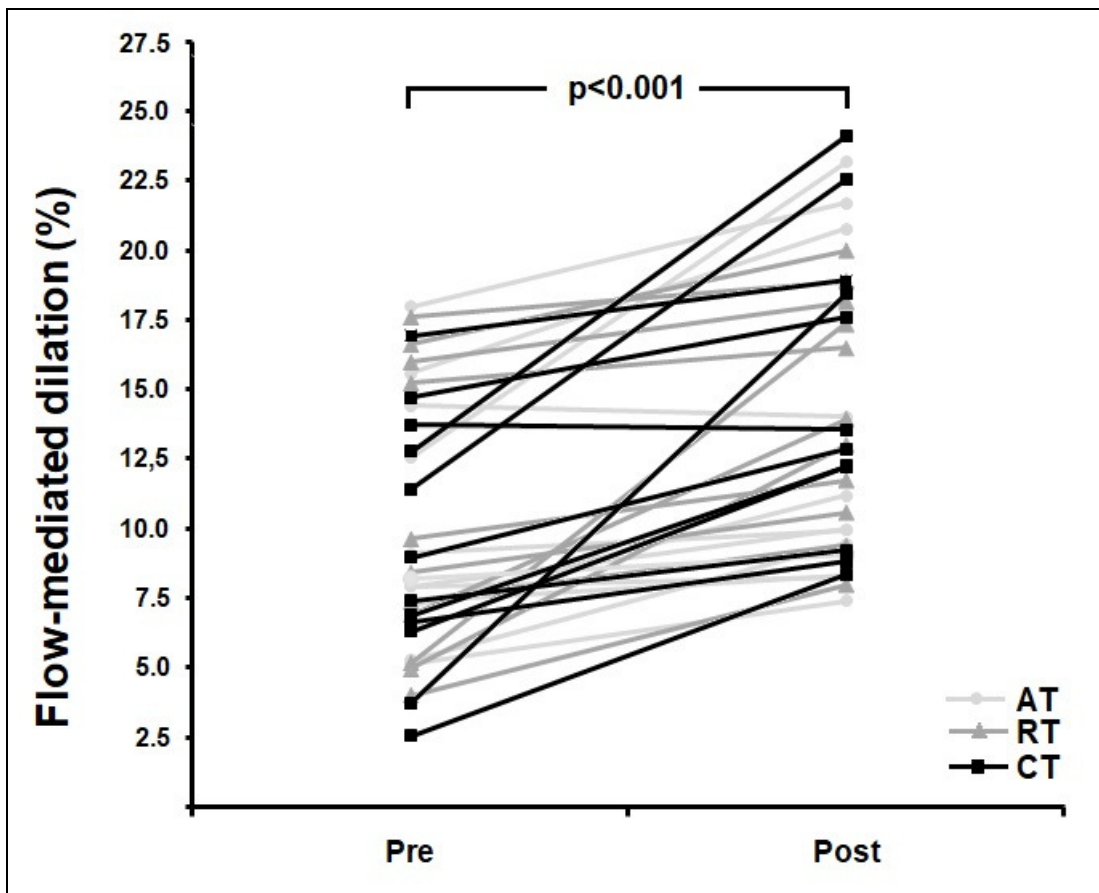

**Figure S1** – Individual data points for Flow-mediated dilation measurements before (pre) and after (post) aerobic exercise training (AT), resistance training (RT), and combined training (CT).
